# Supplementary material for: Thermal treatment of high-density polyethylene films to increase crystallinity for the fabrication of superior radiation-grafted anion-exchange membranes for fuel cells
Source: Royal Society of Chemistry journal article supplement (doi:10.1039/d5ta08440g), 2025-12-22
Supplement: d5ta08440g1.pdf [file d5ta08440g1.pdf]

## Thermal treatment of high-density polyethylene films to increase crystallinity for the fabrication of superior radiation-grafted anion-exchange membranes for fuel cells

Siân A. Franklin, Mozhdeh Mohammadpour, Yingdan Cui, Rachida Bance-Soualhi, Carol Crean, William. E. Mustain, Hungyen Lin and John R. Varcoe

This electronic supplementary information document contains Figures that are in support of those in the main article.

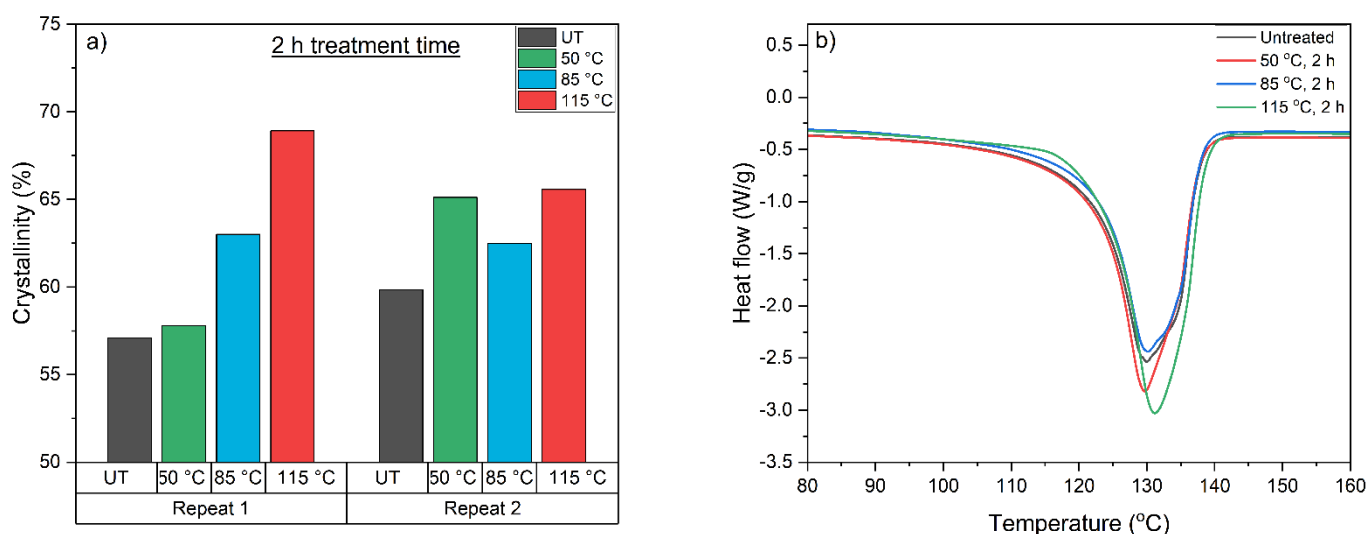

Figure S1: (a) The crystallinity of HDPE film calculated using DSC when left untreated (UT) and when treated in an oven for 2 h at 50, 85 and 115 °C. After treatment samples were cooled naturally. This measurement was repeated twice at two separate locations on each sample. (b) The endothermic melting peaks obtained from DSC in a heat cool cycle after thermal treatment of HDPE films.

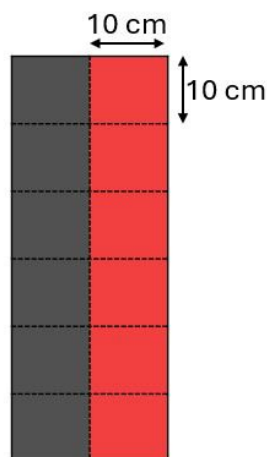

Figure S2: A cartoon depicting how a 20 cm x 60 cm section of film was cut and treated prior to preparing AEMs. The black section was cut and left untreated whilst the red section was treated (24 h at 115 °C) as a complete section and then cut into six 10 cm x 10 cm squares prior to AEM synthesis.
